# Supplementary material
Source: bioRxiv or medRxiv preprint supplement (https://www.biorxiv.org/highwire/filestream/13805/field_highwire_adjunct_files/3/050641-4.pdf)
Supplement: Supplementary file [file 050641-4.pdf]

# Supplemental Figure 4 – Model Schematic

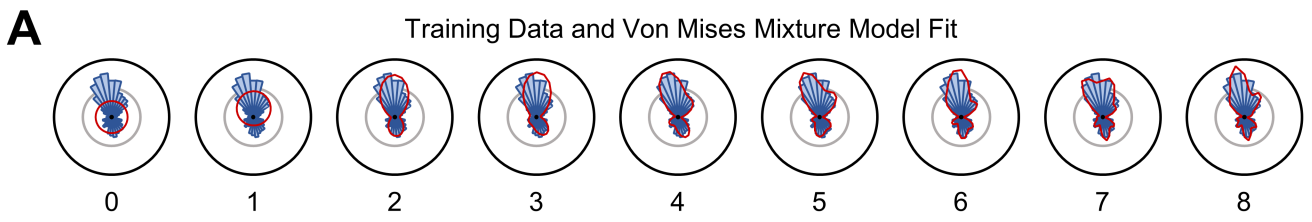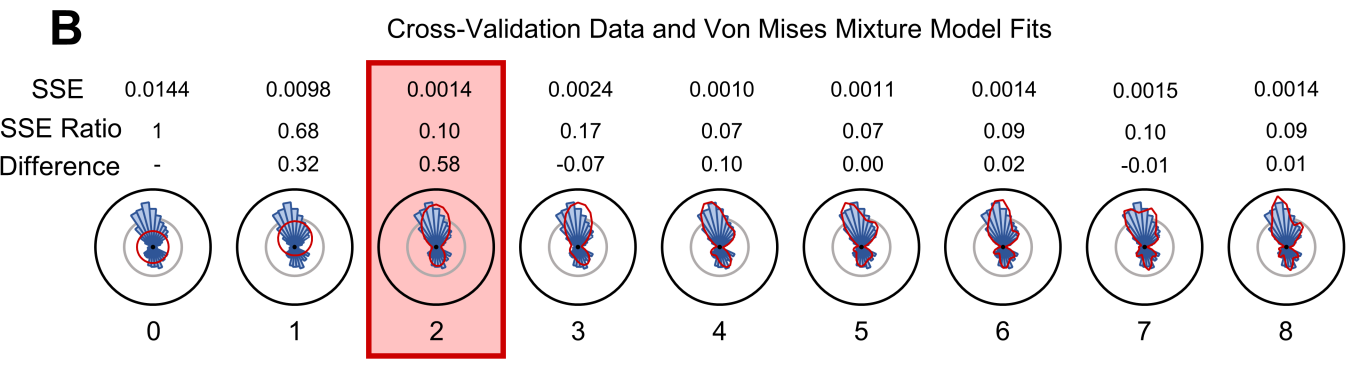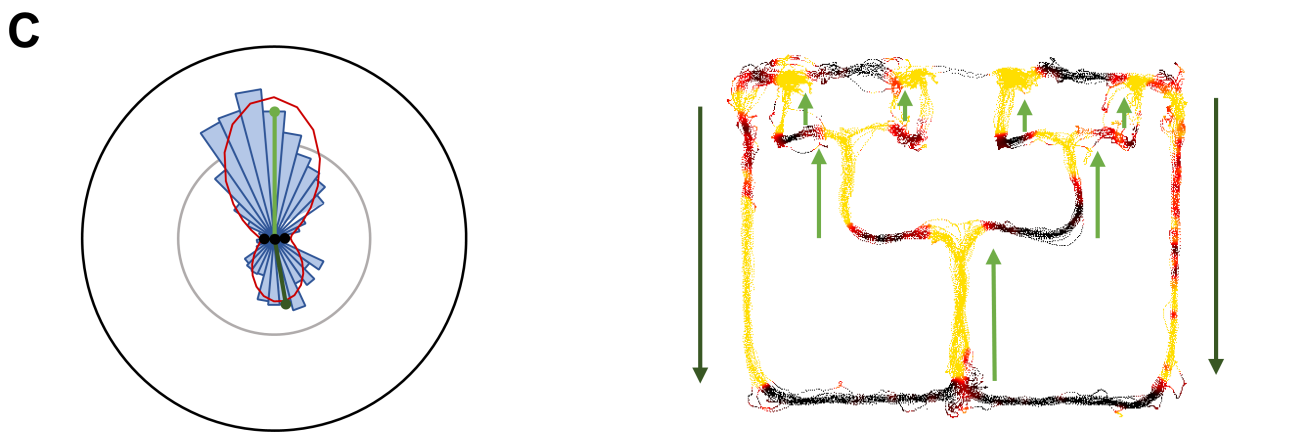

| Rat NS14 - Neuron 28 | Big Peak | Small Peak |
|----------------------|----------|------------|
| Peak Rates (green)   | 22 Hz    | 11 Hz      |
| Min Rates (black)    | 1 Hz     | 2 Hz       |
| Spatial Independence | 88.7%    | 57.1%      |
| Ratio Peaks:Mins     | 8.2 : 1  |            |
